# Supplementary material
Source: publisher site journal article supplement (https://www.dovepress.com/get_supplementary_file.php?f=304859.docx)
Supplement: Supplementary file 1 [file get_supplementary_file.php]

**Supplementary Fig. 1:**


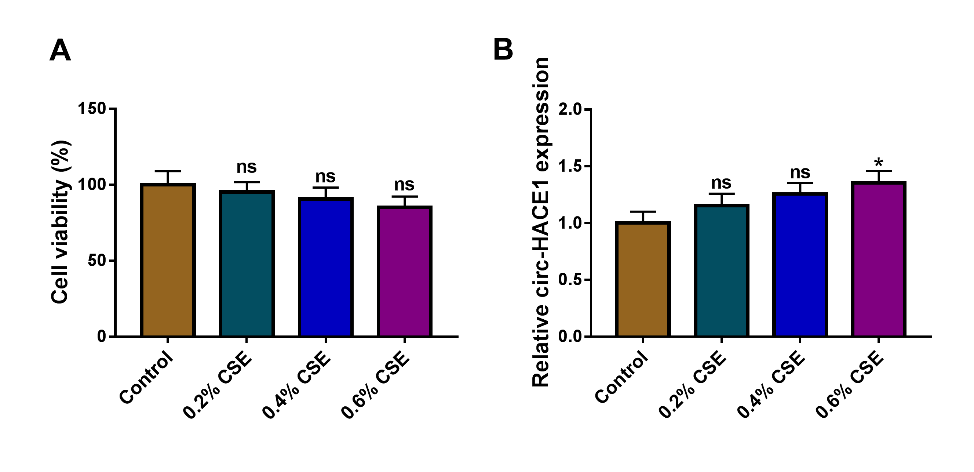


**Supplementary Fig. 1. The non-toxic level test for CSE.** (A-B) Cell viability detection by CCK-8 assay (A) and circ-HACE1 expression analysis by qRT-PCR (B) were performed after 16HBE cells were treated with 0.2% CSE, 0.4% CSE or 0.6% CSE. The circ-HACE1 expression in each CSE group was compared to the control group (set as 1). ns: no significance, **P* < 0.05.

**Supplementary Fig.2:**


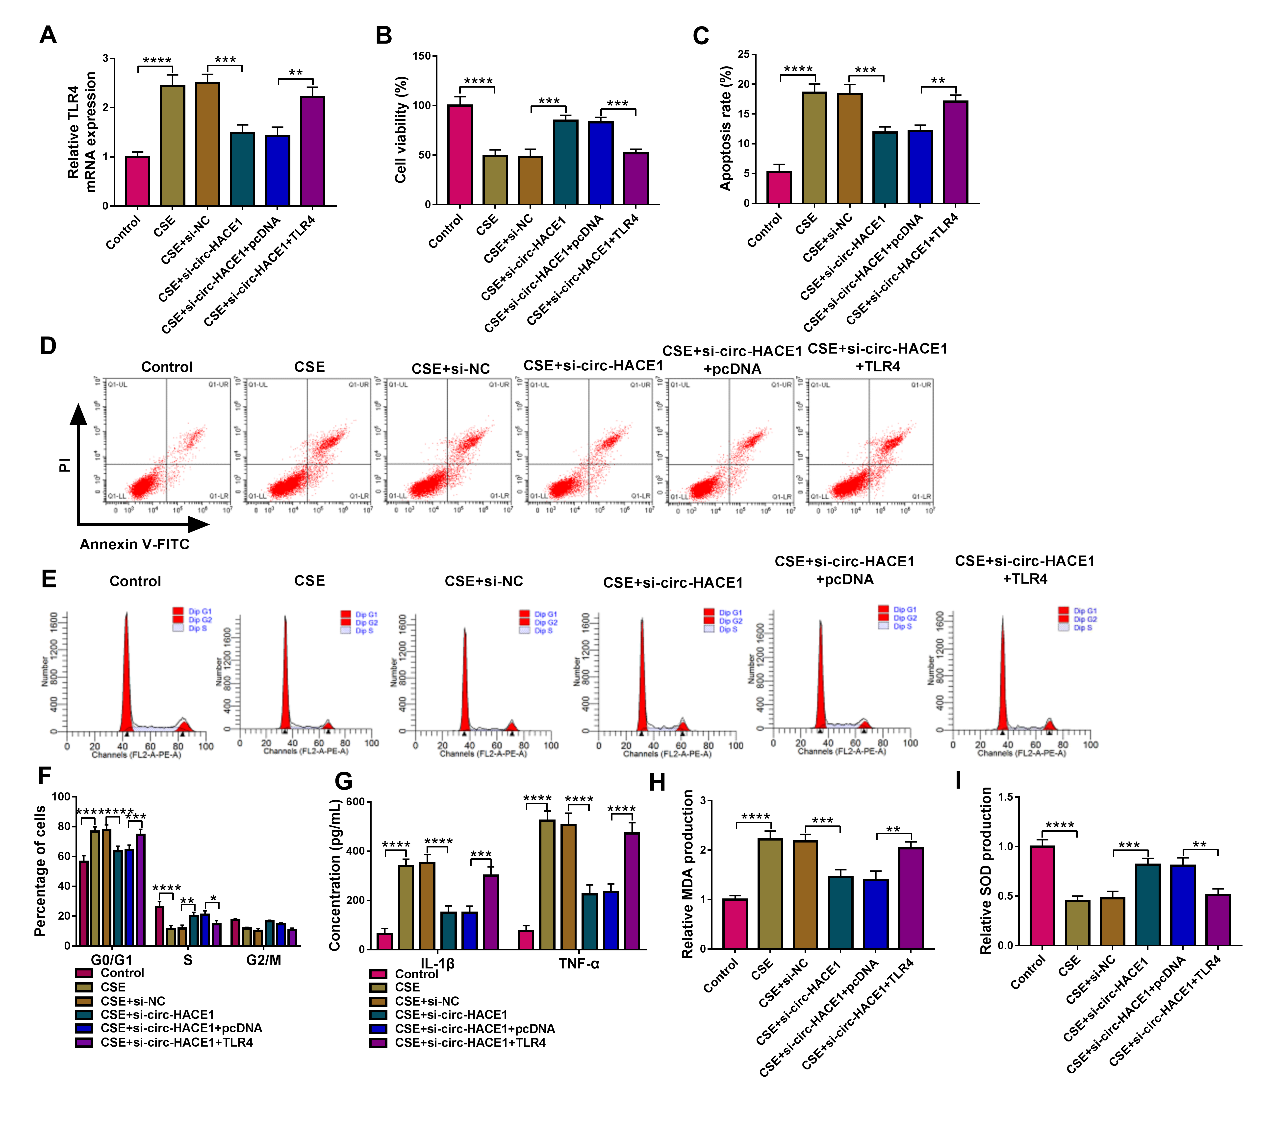


**Supplementary Fig. 2. Overexpression of TLR4 relieved the protective effects of si-circ-HACE1 on CSE-treated 16HBE cells.** 16HBE cells were treated with 2% CSE and transfected with si-circ-HACE1, si-circ-HACE1+TLR4 or the corresponding controls. (A) TLR4 mRNA level was measured by qRT-PCR, and that in each group was compared to the control group (set as 1). (B) Cell viability detection was performed by CCK-8 assay. (C-E) Flow cytometry was used for the analysis of cell apoptosis (C-D) and cell cycle (E). (F-G) The release of inflammatory cytokines was determined using ELISA. (H-I) Oxidative stress was assessed via the level determination of MDA (H) and SOD (I). The relative production of MDA or SOD in each treatment group was compared to the control group (set as 1). **P* < 0.05, ***P* < 0.01, ****P* < 0.001, *****P* < 0.0001.
